# Supplementary material
Source: MDPI journal article supplement (https://www.mdpi.com/2673-8856/3/3/10)
Supplement: s1 [file s1]

# Disease-associated Mutation A554V Disrupts Normal Autoinhibition of DNMT1

Rebecca L. Switzer <sup>1,\*</sup>, Zach J. Hartman <sup>2</sup>, Geoffrey R. Hewett <sup>3</sup> and Clara F. Carroll <sup>1</sup>

<sup>1</sup> Department of Chemistry, Bucknell University, Lewisburg, PA 17837, USA

<sup>2</sup> Department of Biology, Bucknell University, Lewisburg, PA, 17837, USA

<sup>3</sup> Program in Cell Biology/Biochemistry, Bucknell University, Lewisburg, PA 17837, USA

\* Correspondence: rebecca.switzer@bucknell.edu

## Supplementary Materials

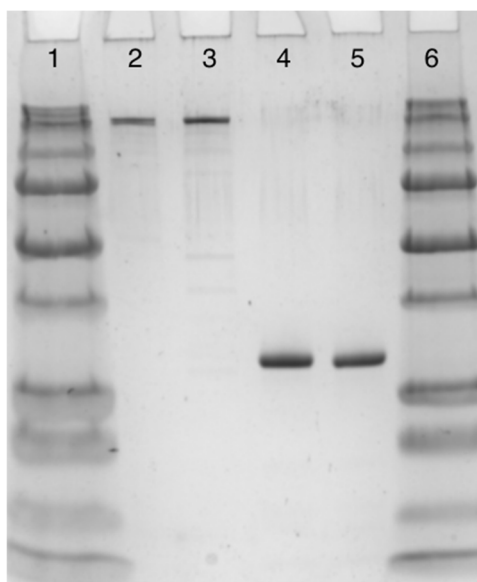

**Figure S1.** SDS-PAGE of purified proteins and domains. Roughly 0.5  $\mu$ g of RFTS-containing DNMT1 proteins and 1.0  $\mu$ g of RFTS domains were separated on a 12% TGX FastCast acrylamide gel (Bio-Rad) and stained using GelCode Blue (Thermo Fisher Scientific). Lanes 1 and 6: Bio-Rad Precision Plus Protein All Blue Prestained Ladder; Lane 2: wild-type RFTS-containing DNMT1; Lane 3: A554V RFTS-containing DNMT1; Lane 4: wild-type RFTS domain; Lane 5: A554V RFTS domain.

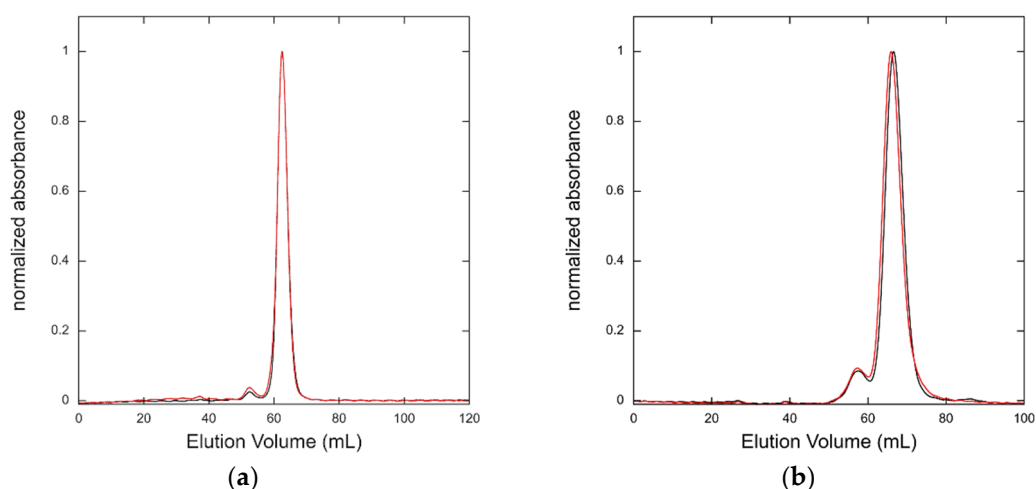

**Figure S2.** Size-exclusion chromatograms of purified proteins and domains. **(a)** Purified wild-type (black) and A554V (red) RFTS domain was run on a Superdex 75 column. Both proteins elute as a single peak with a retention volume of 62.5 mL, indicating the mutation did not significantly impact the structure of the domain. **(b)** Purified wild-type (black) and A554V (red) RFTS-containing DNMT1 was run on a Superdex 200 column. Both proteins elute with a major single peak. The retention volume for the wild-type protein was 66.6 mL while the mutant protein eluted slightly earlier with a retention volume of 65.9 mL, suggesting the mutation resulted in a slight structural change in the larger protein. Absorbance values were normalized for visualization.

**Table S1.** Replicate melts of the RFTS domain by CD.

| Protein   | Wavelength | Observed $T_m$ (°C) <sup>1</sup> |
|-----------|------------|----------------------------------|
| Wild-type | 198 nm     | 47.0 ± 0.1                       |
| Wild-type | 198 nm     | 47.0 ± 0.1                       |
| Wild-type | 198 nm     | 46.8 ± 0.1                       |
| Wild-type | 200 nm     | 46.9 ± 0.2                       |
| A554V     | 198 nm     | 47.0 ± 0.1                       |
| A554V     | 198 nm     | 46.7 ± 0.1                       |
| A554V     | 198 nm     | 47.0 ± 0.1                       |
| A554V     | 200 nm     | 47.0 ± 0.1                       |

<sup>1</sup>Melting curves were fit to the Boltzmann equation to determine the observed  $T_m$ .

**Table S2.** Replicate melts of RFTS-containing DNMT1 by CD.

| <b>Protein</b> | <b>Wavelength</b> | <b>Observed T<sub>m</sub> (°C)<sup>1</sup></b> |
|----------------|-------------------|------------------------------------------------|
| Wild-type      | 207 nm            | 55.0 ± 0.1                                     |
| Wild-type      | 207 nm            | 54.9 ± 0.1                                     |
| Wild-type      | 207 nm            | 55.1 ± 0.1                                     |
| Wild-type      | 198 nm            | 55.3 ± 0.3                                     |
| A554V          | 207 nm            | 53.2 ± 0.1                                     |
| A554V          | 207 nm            | 53.4 ± 0.1                                     |
| A554V          | 207 nm            | 53.2 ± 0.1                                     |
| A554V          | 198 nm            | 53.3 ± 0.5                                     |

<sup>1</sup>Melting curves were fit to the Boltzmann equation to determine the observed T<sub>m</sub>.

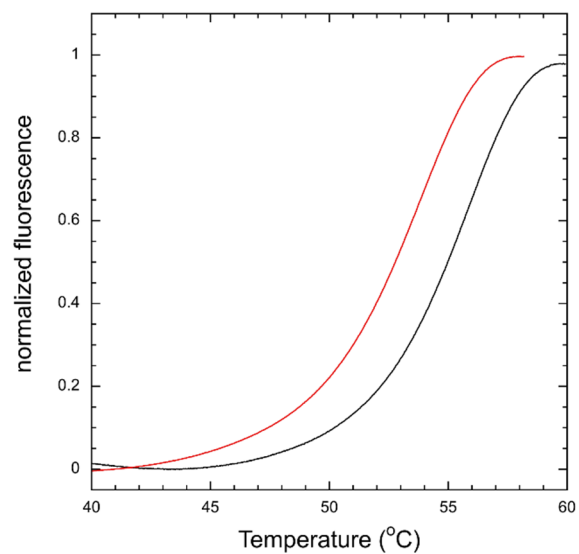

**Figure S3.** Differential scanning fluorimetry of RFTS-containing DNMT1. Representative melting curves for wild-type (black) and A554V (red) RFTS-containing DNMT1. SYPRO Orange fluorescence has been normalized for visualization. Fitting the melting curves to the Boltzmann equation yields observed  $T_m$  values of  $55.2 \pm 0.1$  °C and  $53.2 \pm 0.1$  °C for wild-type and A554V RFTS-containing DNMT1, respectively.
